# Supplementary material for: Quantifying Use of a Health Virtual Community of Practice for General Practitioners’ Continuing Professional Development: A Novel Methodology and Pilot Evaluation
Source: PubMed Central journal article supplement (PMC6906624; doi:10.2196/14545), 2019-11-27
Supplement: jmir_v21i11e14545_app1.pdf [file jmir_v21i11e14545_app1.pdf]

## Multimedia Appendix 1

Appendix 1. A Brief Explanation of CFC HUB Design Principles from our previous work.

| Design Principle                         | Definition                                                                                                                                                         | Example for Implementation                                                                                                          |
|------------------------------------------|--------------------------------------------------------------------------------------------------------------------------------------------------------------------|-------------------------------------------------------------------------------------------------------------------------------------|
| <b>Rich Profile Information</b>          | A customizable profile for participants enables individual identity, empowerment for social networking opportunities, and a rich presentation of personal content. | Providing a first and last name results in a real identity which increases trust among participants.                                |
| <b>Platform Navigation</b>               | An easy-to-use platform can help in increasing interaction and participation in a HVCoP.                                                                           | Providing help tips, hints, or a video tutorial in the interface for assisting new and old users in the navigation of the platform. |
| <b>Diverse Community</b>                 | A diverse non-competing group of health practitioners can increase interaction and participation because of networking opportunities.                              | Having a mixture of GPs in seniority level (i.e. GP trainees and Senior GPs) sharing their own experiences together.                |
| <b>Rich Contextual Content</b>           | High quality content provided to participants can be an incentive to increase HVCoP engagement and participation.                                                  | Providing resources that are curated by facilitators from verified evidence-based research.                                         |
| <b>Patient Information Anonymization</b> | Having a mechanism to anonymize patient information inside the HVCoP would lead to giving confidence to any health practitioner of protecting privacy of patients. | Any Case Study that would be shared should be filtered and anonymized by facilitators to keep patient privacy secured.              |
| <b>Human Roles</b>                       | Moderators, administrators, and facilitators provide a learning scaffold for participants in a HVCoP.                                                              | Moderating online discussions to stop and block inappropriate user actions to maintain the community's safe space and value.        |
