# Supplementary material for: Quantifying Use of a Health Virtual Community of Practice for General Practitioners’ Continuing Professional Development: A Novel Methodology and Pilot Evaluation
Source: PubMed Central journal article supplement (PMC6906624; doi:10.2196/14545), 2019-11-27

## Multimedia Appendix 2

Appendix 2. A brief graphical representation of using two analytical tools to process data.

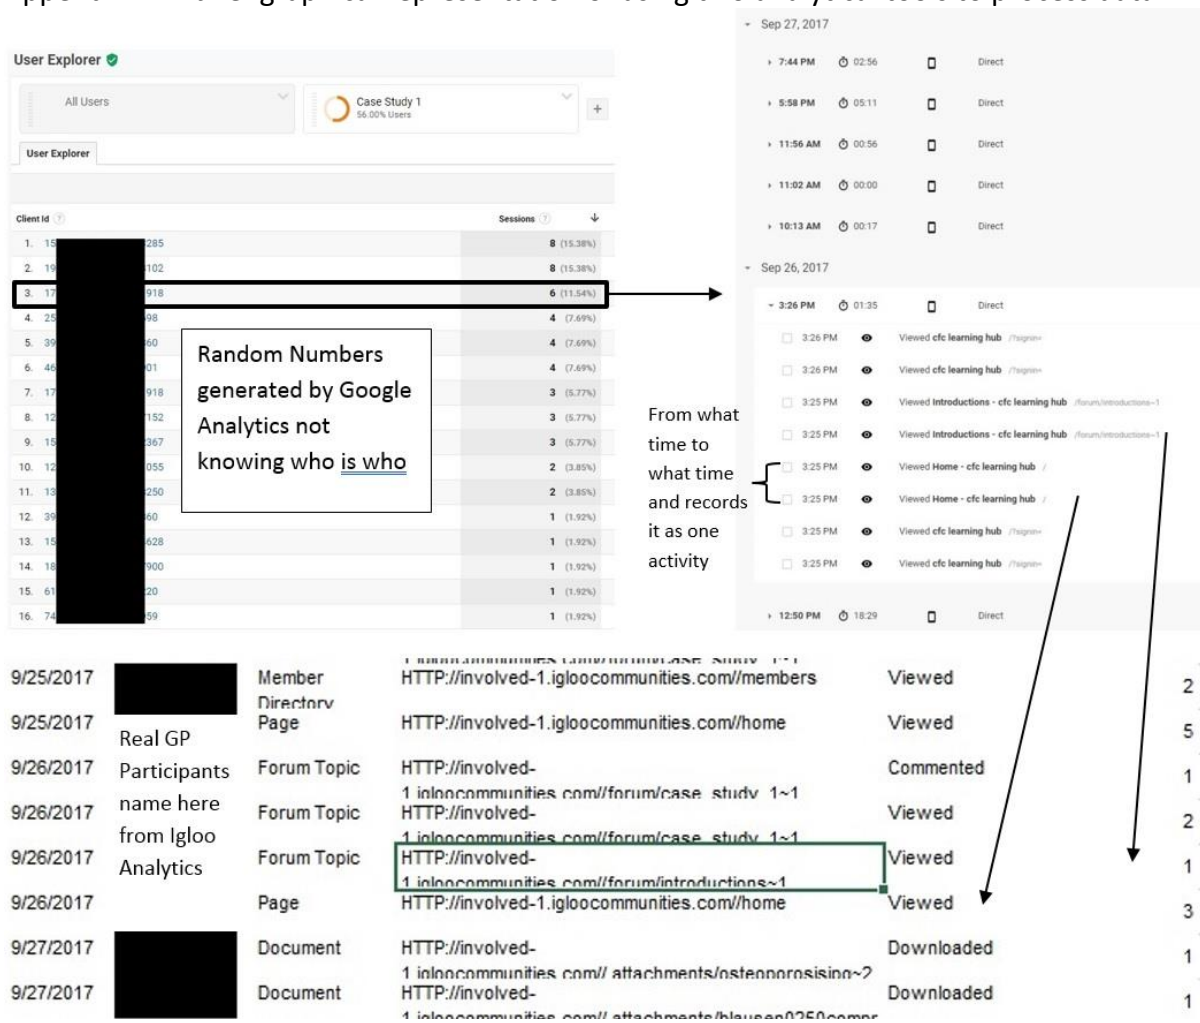

Supplement: jmir_v21i11e14545_app2.pdf [file jmir_v21i11e14545_app2.pdf]
